# Supplementary material for: Ultra-thin metal–organic framework nanosheets for chemo-photodynamic synergistic therapy
Source: Royal Society of Chemistry journal article supplement (doi:10.1039/d1tb00528f), 2021-01-01
Supplement: d1tb00528f1.pdf [file d1tb00528f1.pdf]

## Supporting Information

### **An Ultra-thin Metal-organic Framework Nanosheet for Chemo-photodynamic Synergistic Therapy**

Rui Zeng<sup>‡a</sup>, Tingting He<sup>‡a</sup>, Lu Lu<sup>a</sup>, Ke Li<sup>a</sup>, Zhong Luo<sup>\*b</sup>, Kaiyong Cai<sup>\*a</sup>

a. College of Bioengineering, Chongqing University, Chongqing 400044, China.

b. School of Life Science, Chongqing University, Chongqing 400044, China.

<sup>‡</sup> Co-first authors: the authors contributed equally to this work.

\* Corresponding author: Prof. Dr. Zhong Luo; Prof. Dr. Kaiyong Cai

College of Bioengineering

Chongqing University,

Chongqing 400044,

China

Tel: +86-23-65111802

Fax: +86-23-65102877

E-mail: [kaiyong\\_cai@cqu.edu.cn](mailto:kaiyong_cai@cqu.edu.cn)

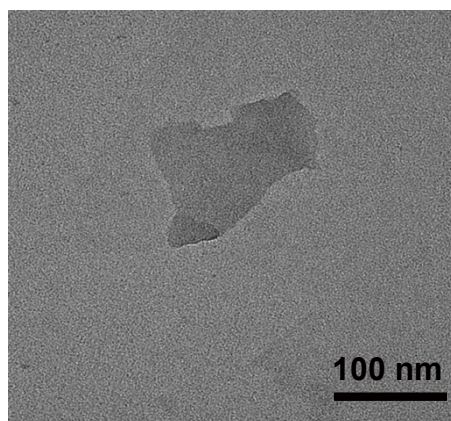

**Figure S1.** Transmission electron micrograph of DOX@Cu-TCPP nanosheets.

(A)

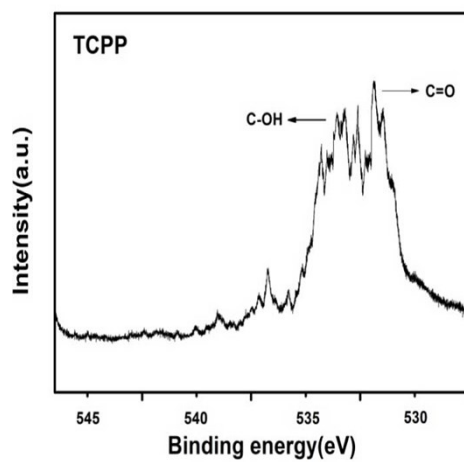

(B)

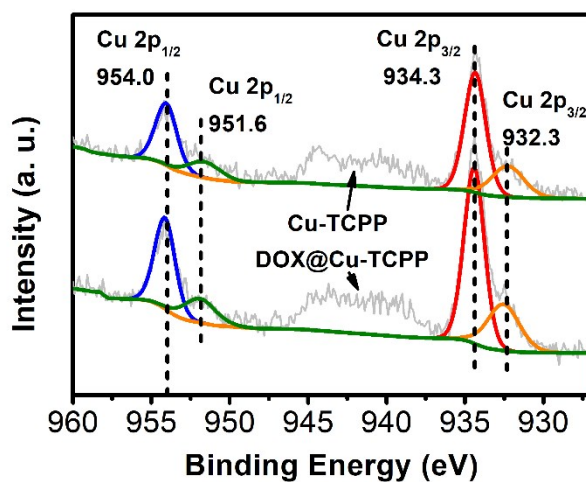

**Figure S2.** (A) High-resolution O 1s XPS spectra of TCP nanosheets. (B) High-resolution Cu 2p XPS spectra of Cu-TCP nanosheets and DOX@Cu-TCP nanosheets.

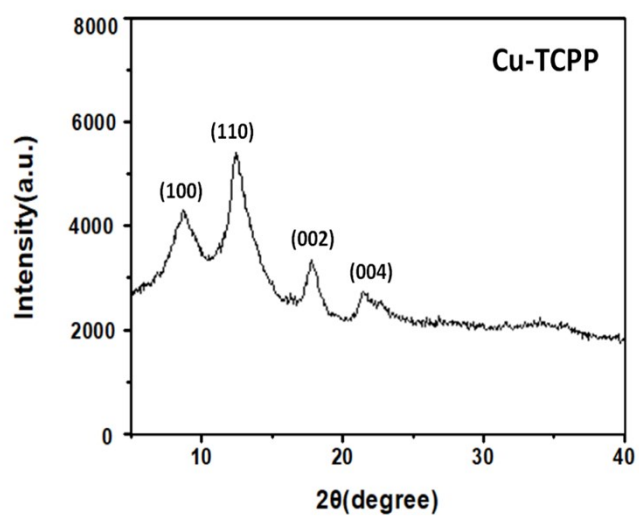

**Figure S3.** The XRD patterns of Cu-TCPP nanosheets.

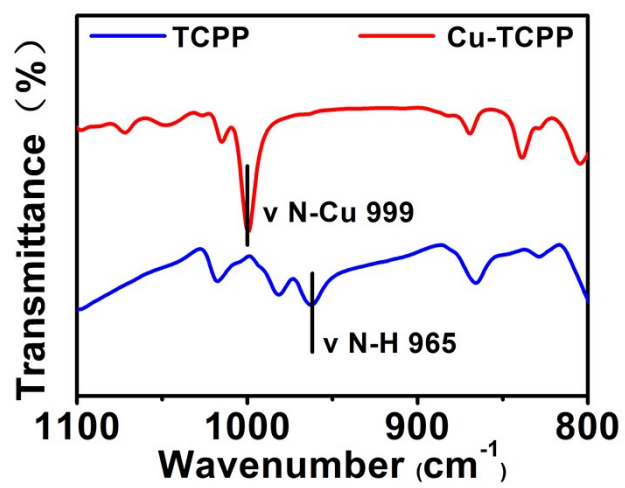

**Figure S4.** FT-IR spectra of TCPP/Cu-TCPP nanosheets.

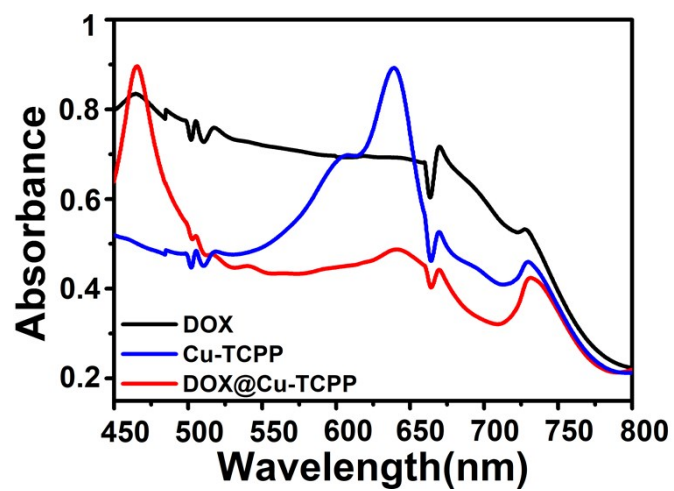

**Figure S5.** UV-Vis absorption spectrums of DOX, Cu-TCPP, DOX@Cu-TCPP nanosheets.

(A)

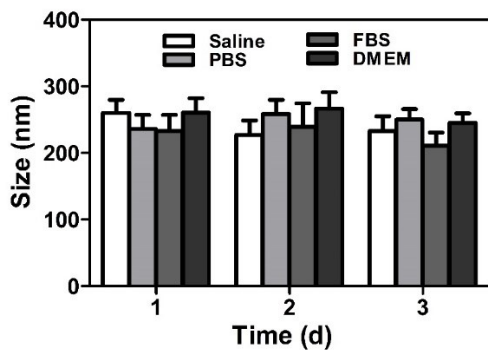

(B)

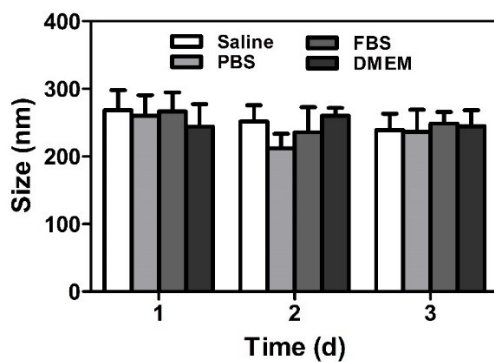

(C)

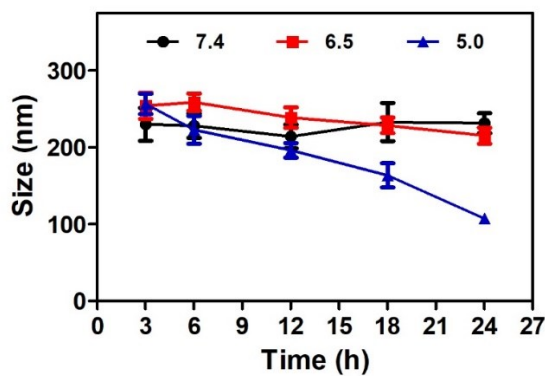

**Figure S6.** Hydrodynamic diameter of Cu-TCPP (A) and DOX@Cu-TCPP (B) nanosheets in saline, PBS, FBS and DMEM during 3 days, respectively. (C) The degradation of DOX@Cu-TCPP nanosheets under different pH values during 24 hours.

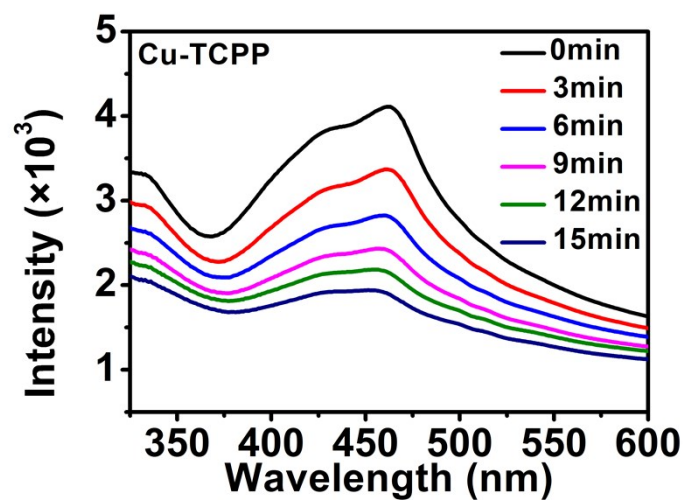

**Figure S7.** Absorption spectra of DPBF solution in presence of Cu-TCPP nanosheets under laser irradiation for different times.



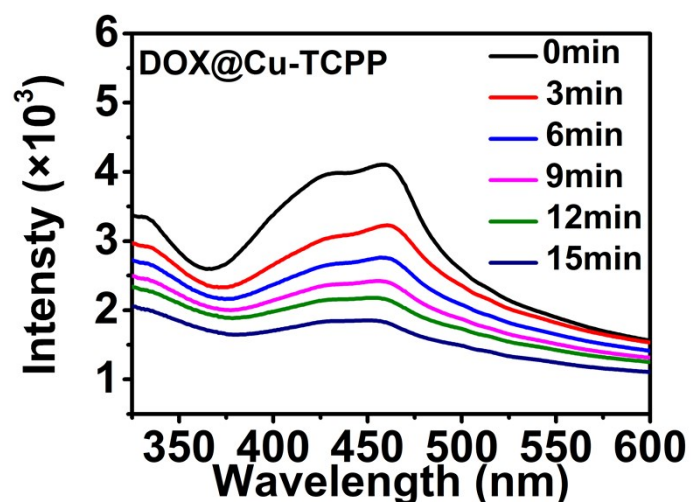

**Figure S8.** Absorption spectra of DPBF solution in presence of DOX@Cu-TCP nanosheets under laser irradiation for different times.

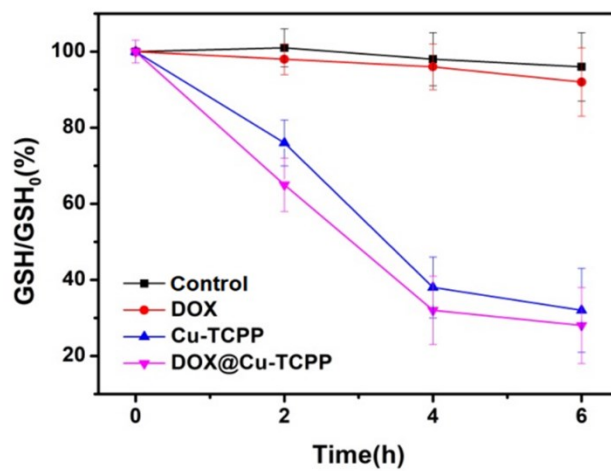

**Figure S9.** The changes of GSH concentrations in 6 h after incubation of 4T1 cells with DOX (30  $\mu\text{g}/\text{mL}$ ), Cu-TCPP (60  $\mu\text{g}/\text{mL}$ ), DOX@Cu-TCPP (90  $\mu\text{g}/\text{mL}$ ) and blank control.

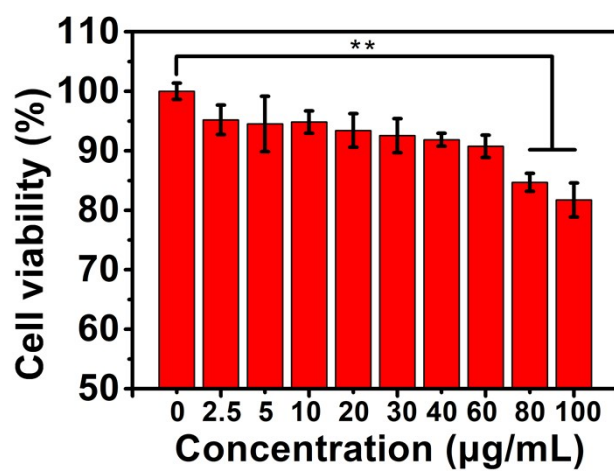

**Figure S10.** The activity of 4T1 cells after incubation with different concentrations of Cu-TCPP nanosheets for 24 hours. \*  $p < 0.05$ , \*\*  $p < 0.01$ .

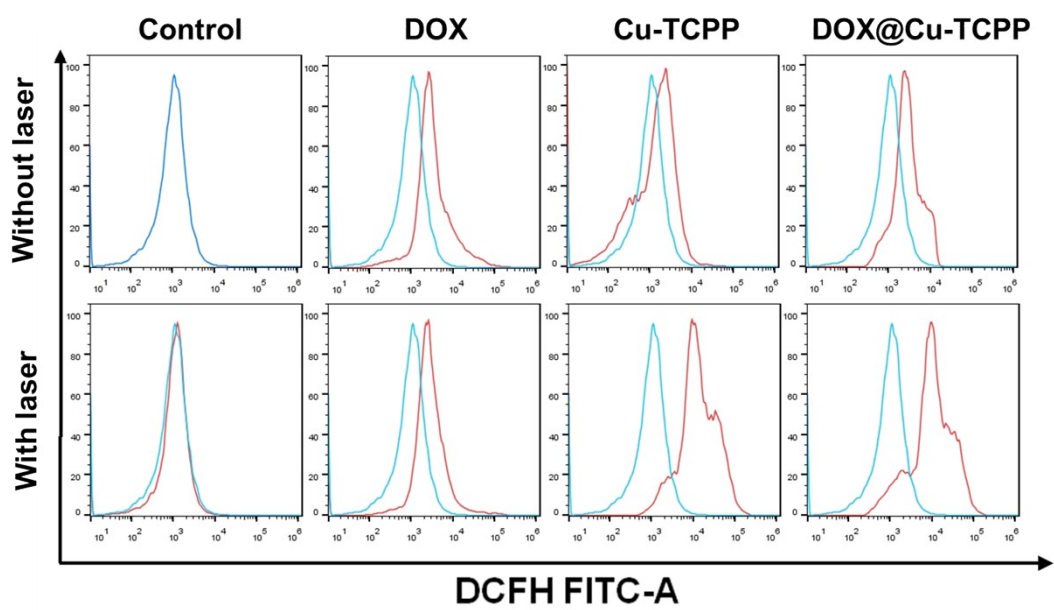

**Figure S11.** Flow cytometry detection of intracellular ROS in 4T1 cells after the different treatments.

(A)

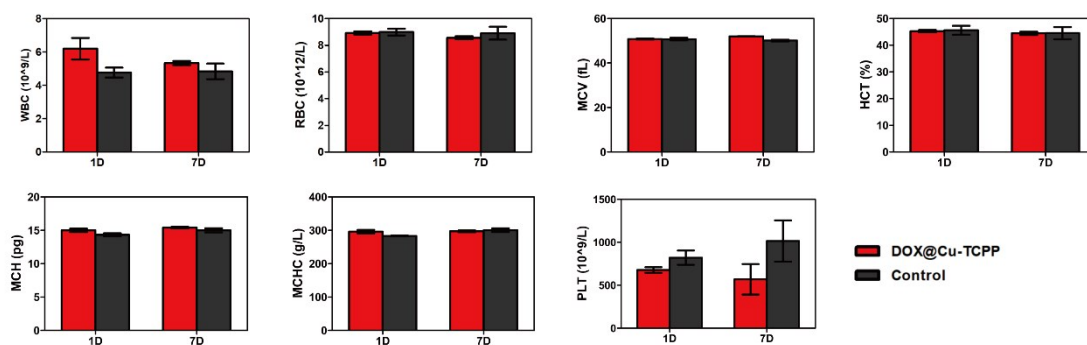

(B)

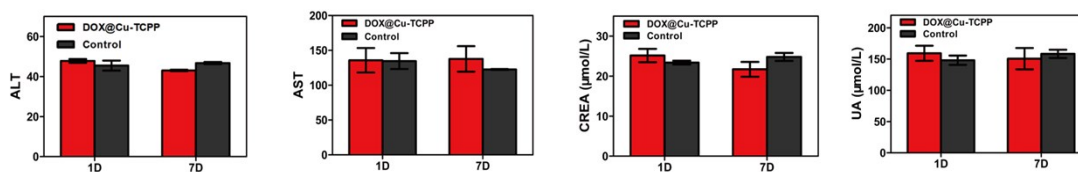

**Figure S12.** *In vivo* toxicity evaluation. The blood routine assay (A) and blood biochemical parameters (B) of KM mice intravenously injected with PBS or DOX@Cu-TCPP nanosheets for 1 and 7 days.

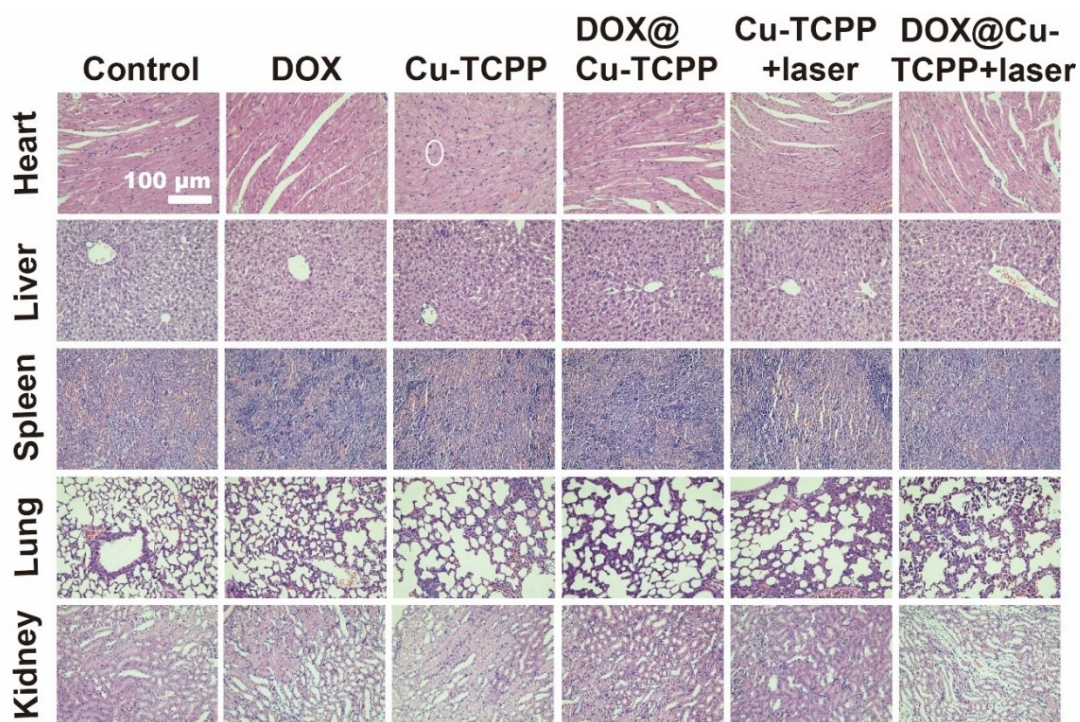

**Figure S13.** Histological assessments of the tumor and main organs extracted from tumor bearing mice after treatment with TCPS, Free DOX, Cu-TCPP, DOX@Cu-TCPP, Cu-TCPP with laser, DOX@Cu-TCPP with laser. The ovals indicate the tissue damage incurred by DOX, the scale bar is 100  $\mu\text{m}$ .

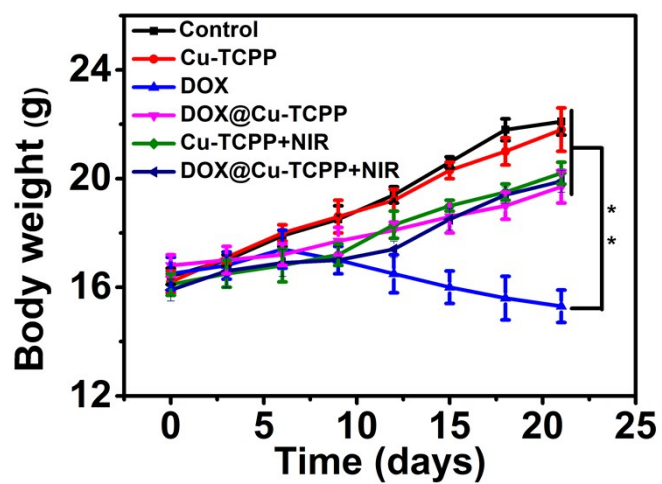

**Figure S14.** Average body weight changes of tumor-bearing mice along with the different treatments,  $n = 6$ ,  $**p < 0.01$ .
